# Supplementary material
Source: publisher site journal article supplement (https://www.dovepress.com/article/237334)
Supplement: Supplementary file 1 [file get_supplementary_file.php]

**Supplementary file**

**Fig. S1.** The chondrocytes phenotype (RNA analysis) were tested by quantitative real-time PCR for gene expression regarding collagen type 1 (Col1) and type 2 (Col2) and Sox9 genes relatively compared with internal control GAPDH. The high expression of Sox9 is a great indicative for chondrocyte activity, what corroborated with higher expression for collagen type II (Col2) than collagen type I.

**References**

1. Shi S, Wang C, Action AJ, Eckert GJ, Trippel SB. Role of Sox9 in Growth Factor Regulation

of Articular Chondrocytes. *J. Cell. Biochem.* 2015;116:1391-1400.

<https://doi.org/10.1002/jcb.25099>.

2. Costa E, González-García C, Gómez Ribelles JL, Salmerón-Sánchez M. Maintenance of

chondrocyte phenotype during expansion on PLLA microtopographies. *J. Tissue Eng.*

2018;9:2041731418789829. https://doi.org/[10.1177/2041731418789829](https://dx.doi.org/10.1177%2F2041731418789829).
